# Supplementary material for: Association between educational level and smoking cessation in an 11-year follow-up study of a national health survey
Source: PubMed Central journal article supplement (PMC8573358; doi:10.1177/1403494821993721), 2021-03-01
Supplement: sj-pdf-1-sjp-10.1177_1403494821993721.pdf [file sj-pdf-1-sjp-10.1177_1403494821993721.pdf]

**Supplementary Table I.** Association between education and discrete background variables, %, (Panel A) and continuous covariates (Panel B) among baseline daily smokers.

PANEL A: DISCRETE BACKGROUND VARIABLES

|                                             | Low  | Middle | High | p-value <sup>a</sup> |
|---------------------------------------------|------|--------|------|----------------------|
| <b>Gender</b>                               |      |        |      | 0.0096               |
| Men                                         | 37 % | 44 %   | 19 % |                      |
| Women                                       | 39 % | 35 %   | 26 % |                      |
| <b>Employment status</b>                    |      |        |      | <0.001               |
| Employed                                    | 58 % | 77 %   | 82 % |                      |
| Unemployed or laid off                      | 18 % | 12 %   | 8 %  |                      |
| Retired                                     | 21 % | 7 %    | 5 %  |                      |
| Other / missing                             | 4 %  | 4 %    | 5 %  |                      |
| <b>Marital status</b>                       |      |        |      | 0.8055               |
| Living with a partner                       | 67 % | 66 %   | 69 % |                      |
| Living without a partner                    | 33 % | 34 %   | 31 % |                      |
| <b>Under-aged children in the household</b> |      |        |      | <0.001               |
| None                                        | 66 % | 49 %   | 53 % |                      |
| At least one                                | 34 % | 51 %   | 47 % |                      |
| <b>Alcohol consumption</b>                  |      |        |      | 0.0008               |
| No use                                      | 30 % | 20 %   | 14 % |                      |
| Moderate use                                | 55 % | 61 %   | 64 % |                      |
| Heavy use                                   | 15 % | 19 %   | 22 % |                      |
| <b>Self-perceived health</b>                |      |        |      | <0.001               |
| Other                                       | 45 % | 25 %   | 27 % |                      |
| Good                                        | 55 % | 75 %   | 73 % |                      |
| <b>BMI</b>                                  |      |        |      | 0.8570               |
| Normal weight                               | 45 % | 47 %   | 46 % |                      |
| Overweighted                                | 36 % | 37 %   | 36 % |                      |
| Obese                                       | 19 % | 16 %   | 18 % |                      |
| <b>Symptoms of depression</b>               |      |        |      | 0.0544               |
| None/minimal                                | 68 % | 77 %   | 76 % |                      |
| Mild                                        | 20 % | 15 %   | 18 % |                      |
| Moderate/severe                             | 13 % | 8 %    | 7 %  |                      |

PANEL B: CONTINUOUS COVARIATES<sup>b</sup>

|                           | Coefficient | 95 % CI        | p-value |
|---------------------------|-------------|----------------|---------|
| <b>Age</b>                | -2.571      | -3.42, (-1.72) | <0.001  |
| <b>Income per month</b>   | 19.65       | 14.48-24.83    | <0.001  |
| <b>Cigarettes per day</b> | -1.554      | -2.27, (-0.83) | <0.001  |
| <b>Plasma cotinine</b>    | -0.086      | -0.14, (-0.03) | 0.002   |

<sup>a</sup>: P-value from Chi-squared test

<sup>b</sup>: Coefficients from linear regression, covariate as the dependent variable and education as the independent variable
