# Supplementary material for: Association between educational level and smoking cessation in an 11-year follow-up study of a national health survey
Source: PubMed Central journal article supplement (PMC8573358; doi:10.1177/1403494821993721), 2021-03-01
Supplement: sj-pdf-3-sjp-10.1177_1403494821993721.pdf [file sj-pdf-3-sjp-10.1177_1403494821993721.pdf]

**Supplemental Table SIII.** Baseline characteristics of *non-respondents* at the follow-up (Panel A), and univariate association (Panel B) and multivariable association (Panel C) between *participation* at the follow-up and baseline background variables, odds ratios (OR) and their 95 % confidence intervals (95% CI).

|                                             | PANEL A     | PANEL B <sup>a</sup> |            | PANEL C <sup>b</sup> |            |
|---------------------------------------------|-------------|----------------------|------------|----------------------|------------|
|                                             | % (n)       | OR                   | 95% CI     | OR                   | 95% CI     |
| <b>DEMOGRAPHIC VARIABLES</b>                |             |                      |            |                      |            |
| <b>Educational level</b>                    |             |                      |            |                      |            |
| Basic                                       | 47% (189)   | 1.00                 |            | 1.00                 |            |
| Middle                                      | 40% (161)   | <b>1.31*</b>         | 1.01, 1.69 | 1.12                 | 0.85, 1.47 |
| High                                        | 14% (54)    | <b>2.32***</b>       | 1.65, 3.29 | <b>1.58*</b>         | 1.11, 2.26 |
| <b>Age (mean)</b>                           | 45.9 (407)  | 0.99                 | 0.98, 1.00 | <b>0.98**</b>        | 0.96, 0.99 |
| <b>Gender</b>                               |             |                      |            |                      |            |
| Women                                       | 37% (150)   | 1.00                 |            | 1.00                 |            |
| Men                                         | 63% (257)   | <b>0.67**</b>        | 0.53, 0.85 | <b>0.56***</b>       | 0.43, 0.73 |
| <b>Employment status</b>                    |             |                      |            |                      |            |
| Employed                                    | 58% (237)   | 1.00                 |            | 1.00                 |            |
| Unemployed or laid off                      | 18% (73)    | <b>0.56***</b>       | 0.40, 0.77 | 0.77                 | 0.52, 1.14 |
| Retired                                     | 20% (81)    | <b>0.43***</b>       | 0.31, 0.60 | <b>0.37***</b>       | 0.24, 0.57 |
| Other / missing                             | 4% (16)     | 0.80                 | 0.44, 1.46 | 0.66                 | 0.35, 1.22 |
| <b>Marital status</b>                       |             |                      |            |                      |            |
| Living without a partner                    | 37% (152)   | 1.00                 |            | 1.00                 |            |
| Living with a partner                       | 63% (255)   | 1.26                 | 0.99, 1.60 | <b>1.56**</b>        | 1.19, 2.04 |
| <b>Under-aged children in the household</b> |             |                      |            |                      |            |
| None                                        | 57% (230)   | 1.00                 |            | 1.00                 |            |
| At least one                                | 43% (177)   | 0.91                 | 0.72, 1.14 | <b>0.71*</b>         | 0.52, 0.95 |
| <b>Income per month (mean)</b>              | 84.60 (351) | <b>1.00***</b>       | 1.00, 1.01 | 1.00                 | 1.00, 1.00 |
| <b>HEALTH-RELATED VARIABLES</b>             |             |                      |            |                      |            |
| <b>Cigarettes per day (mean)</b>            | 17.5 (357)  | <b>0.98**</b>        | 0.97, 0.99 | 0.99                 | 0.98, 1.01 |
| <b>Plasma cotinine<sup>c</sup> (mean)</b>   | 495.3 (315) | 0.92                 | 0.75, 1.15 | 0.93                 | 0.80, 1.08 |
| <b>Alcohol consumption</b>                  |             |                      |            |                      |            |
| No use                                      | 26% (86)    | 1.00                 |            | 1.00                 |            |
| Moderate use                                | 52% (171)   | <b>1.42*</b>         | 1.04, 1.92 | 0.97                 | 0.71, 1.31 |
| Heavy use                                   | 22% (73)    | 0.95                 | 0.65, 1.38 | 0.81                 | 0.55, 1.19 |
| <b>Self-perceived health</b>                |             |                      |            |                      |            |
| Other                                       | 42% (170)   | 1.00                 |            | 1.00                 |            |
| Good                                        | 58% (237)   | <b>1.53***</b>       | 1.21, 1.95 | 1.27                 | 0.98, 1.64 |
| <b>BMI</b>                                  |             |                      |            |                      |            |
| Normal weight                               | 41% (168)   | 1.00                 |            | 1.00                 |            |
| Overweight                                  | 37% (152)   | 0.90                 | 0.69, 1.17 | 0.83                 | 0.63, 1.08 |
| Obese                                       | 21% (87)    | 0.77                 | 0.56, 1.05 | 0.77                 | 0.56, 1.06 |
| <b>Symptoms of depression</b>               |             |                      |            |                      |            |
| None/minimal                                | 71% (214)   | 1.00                 |            | 1.00                 |            |
| Mild                                        | 21% (61)    | 0.79                 | 0.57, 1.11 | 0.81                 | 0.60, 1.09 |
| Moderate/severe                             | 9% (26)     | 0.93                 | 0.58, 1.49 | 1.17                 | 0.75, 1.82 |

<sup>a</sup>: Univariate association between response at the follow-up and baseline background variable

<sup>b</sup>: Multivariable association between response at the follow-up and baseline background variables; all the variables included simultaneously in the model

c: Continuous in Panel A, in quintiles in Panel B and Panel C. OR per an increment of one quintile; the cut-off points were 2, 7, 14, and 220

**Bold typeface indicates statistical significance ( $p < 0.05$ )**

\*  $p < 0.05$ , \*\* $p < 0.01$ , \*\*\* $p < 0.001$
